# Supplementary material for: Problem-Solving Education to Prevent Depression Among Low-Income Mothers: A Path Mediation Analysis in a Randomized Clinical Trial
Source: PubMed Central journal article supplement (PMC6324419; doi:10.1001/jamanetworkopen.2018.0334), 2018-06-29

## Supplementary Online Content

Silverstein M, Cabral H, Hegel M, et al. Problem-solving education to prevent depression among low-income mothers: a path mediation analysis in a randomized clinical trial. *JAMA Netw Open*. 2018;1(2):e180334. doi:10.1001/jamanetworkopen.2018.0334

**eTable.** Single Mediator Pathways With Unstandardized Values

**eFigure 1.** Full Multivariate Model With Unstandardized Values

**eFigure 2.** Parsimonious Multivariate Path Model With Unstandardized Values

This supplementary material has been provided by the authors to give readers additional information about their work.

## Appendix – Unstandardized Values

The following Tables/Figures present the same data as in the main manuscript, but with unstandardized values.

**eTable: Single Mediatorial Pathways With Unstandardized Values (Analogous to Table 2 in the main paper)**

|                                 | Relationship between PSE and Mediators                                          |                                                                                               | Relationship between Mediators and Outcomes                                                    |                                                                                                             |
|---------------------------------|---------------------------------------------------------------------------------|-----------------------------------------------------------------------------------------------|------------------------------------------------------------------------------------------------|-------------------------------------------------------------------------------------------------------------|
|                                 | Path coefficient for change score associated with participation in PSE (95% CI) | Standardized path coefficient for change score associated with participation in PSE (95% CI)* | Rate ratio of depression elevations per 1 unit difference of change in mediator score (95% CI) | Rate ratio of depression elevations per standard deviation difference of change in mediator score (95% CI)* |
| Overall Problem Solving ability | 0.17 (-0.13, 0.47)                                                              | 0.08 (-0.07, 0.23)                                                                            | 0.89 (0.84, 0.95)                                                                              | 0.80 (0.71, 0.90)                                                                                           |
| Mastery                         | -0.13 (-0.45, 0.19)                                                             | -0.05 (-0.19, 0.09)                                                                           | 1.06 (1.01, 1.11)                                                                              | 1.14 (1.01, 1.29)                                                                                           |
| Self-Esteem                     | 0.46 (-0.13, 1.05)                                                              | 0.11 (-0.03, 0.25)                                                                            | 0.94 (0.91, 0.98)                                                                              | 0.79 (0.69, 0.91)                                                                                           |
| Social coping                   | 0.10 (-0.03, 0.23)                                                              | 0.12 (-0.03, 0.27)                                                                            | 1.02 (0.89, 1.17)                                                                              | 1.02 (0.90, 1.15)                                                                                           |
| Behavioral Activation           | 3.10 (0.11, 6.09)                                                               | 0.15 (0.01, 0.30)                                                                             | 0.99 (0.98, 0.99)                                                                              | 0.74 (0.65, 0.83)                                                                                           |
| Avoidant coping‡                | -0.02 (-0.12, 0.08)                                                             | -0.02 (-0.17, 0.13)                                                                           | 1.20 (1.01, 1.44)                                                                              | 1.14 (1.01, 1.30)                                                                                           |
| Problem-focused coping          | 0.12 (0.02, 0.22)                                                               | 0.17 (0.03, 0.31)                                                                             | 1.05 (0.89, 1.24)                                                                              | 1.04 (0.92, 1.17)                                                                                           |
| Perceived Stress‡               | -1.45 (-2.53, -0.37)                                                            | -0.11 (-0.19, -0.03)                                                                          | 0.93 (0.92, 0.95)                                                                              | 0.38 (0.30, 0.47)                                                                                           |

\*Coefficients represent percentage of a standard deviation in change of a mediator score.

‡Negative values for change indicate improvement.

**eFigure 1. Full Multivariate Model With Unstandardized Values (Analogous to Figure 2 in the main paper)**

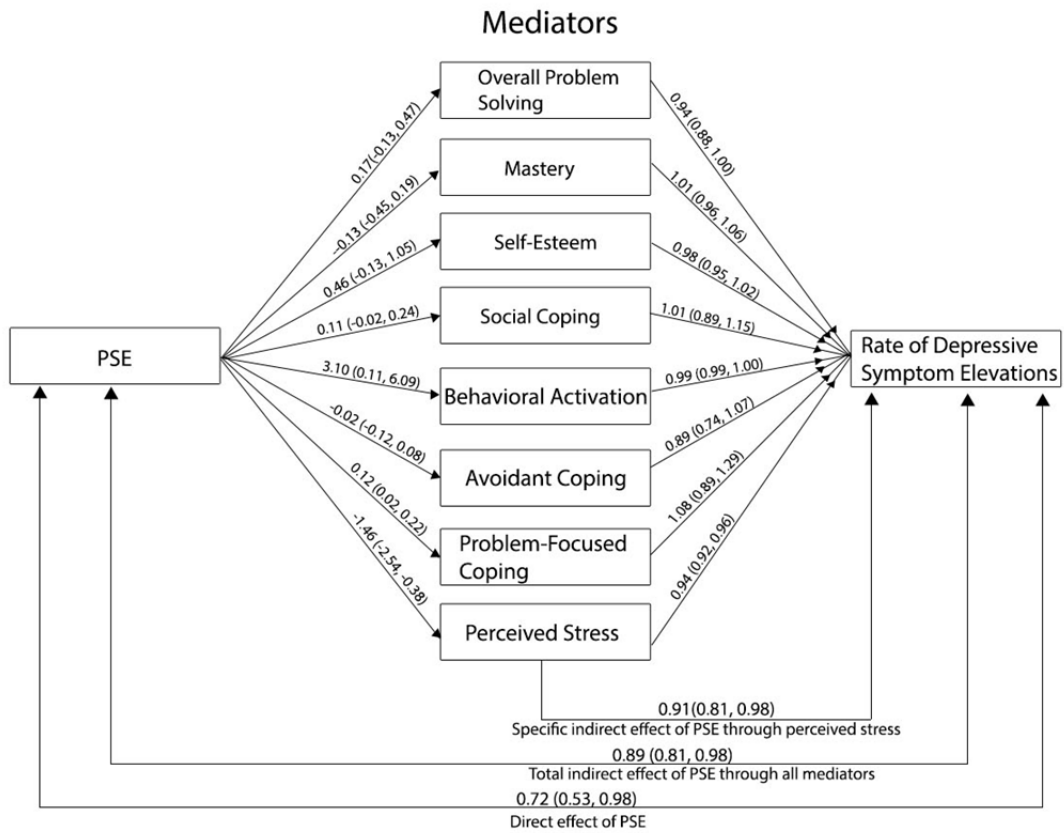

**eFigure 2 Parsimonious Multivariate Path Model With Unstandardized Values (Analogous to Figure 3 in the main paper)**

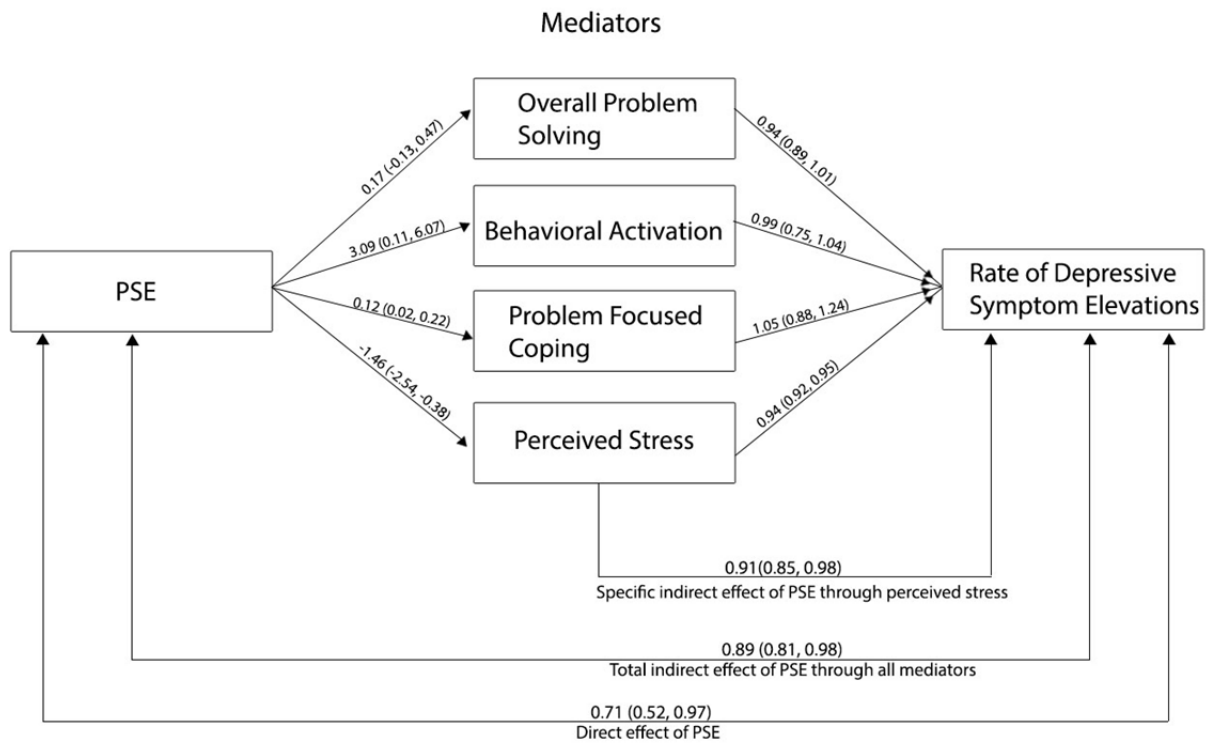

Supplement: jamanetwopen-1-e180334-s002.pdf [file jamanetwopen-1-e180334-s002.pdf]
